# Supplementary material
Source: ML conference proceedings conference paper supplement (https://openaccess.thecvf.com/content/CVPR2023/html/Tan_Backdoor_Attacks_Against_CVPR_2023_paper.html)
Supplement: Supplementary file 1 [file Tan_Backdoor_Attacks_Against_CVPR_2023_supplemental.zip]

Archive with 2 entries (2 files):
- cvpr23_backdoor_supp_compressed.pdf
- __MACOSX/._cvpr23_backdoor_supp_compressed.pdf
